# Supplementary material
Source: PubMed Central journal article supplement (PMC8222091)
Supplement: NIHMS1685792-supplement-1.pdf [file NIHMS1685792-supplement-1.pdf]

**Supplementary Figures & Tables:**

**sTable 1. Surrogates of right ventricular function and hemodynamic stability**

|                                                       | <b>RVAD/ECMO</b>      | <b>IMV-alone</b>         |
|-------------------------------------------------------|-----------------------|--------------------------|
| <b>Echocardiogram</b>                                 | 14 (77.8)             | 7 (33.3)                 |
| Tricuspid regurgitation                               |                       |                          |
| None                                                  | 4 (28.6)              | 1 (14.3)                 |
| Trace                                                 | 6 (42.9)              | 3 (42.3)                 |
| Mild/moderate                                         | 2 (14.3)              | 0 (0.0)                  |
| Unknown/not documented                                | 2 (14.3)              | 3 (42.3)                 |
| Right ventricular function                            |                       |                          |
| Normal                                                | 11 (78.6)             | 5 (71.4)                 |
| Hyperdynamic                                          | 1 (7.1)               | 0 (0.0)                  |
| Mild systolic dysfunction                             | 1 (7.1)               | 2 (28.6)                 |
| Unknown/not documented                                | 1 (7.1)               | 0 (0.0)                  |
| Right ventricular size                                |                       |                          |
| Normal                                                | 9 (64.3)              | 5 (71.4)                 |
| Enlarged                                              | 0 (0.0)               | 1 (14.3)                 |
| Unknown                                               | 5 (35.7)              | 1 (14.3)                 |
| TAPSE (mm)                                            | 2.5 (2.0 – 2.7) (N=2) | 18.5 (16.8 – 19.3) (N=4) |
| <b>Hemodynamics</b>                                   |                       |                          |
| Heart rate (bpm)                                      | 97 (80 – 111)         | 88 (82 – 107)            |
| Systolic blood pressure (mmHg)                        | 116 (106 – 130)       | 113 (100 – 119)          |
| Diastolic blood pressure (mmHg)                       | 61 (53 – 65)          | 57 (53 – 66)             |
| Mean arterial pressure (mmHg)                         | 78 (74 – 85)          | 76 (69 – 85)             |
| <b>Vasopressor Requirements</b>                       |                       |                          |
| Norepinephrine ( $\mu\text{g}/\text{kg}/\text{min}$ ) | 0 (0 – 0.07)          | 0.03 (0 – 0.05)          |
| Epinephrine ( $\mu\text{g}/\text{kg}/\text{min}$ )    | 0 (0)                 | 0 (0)                    |
| Vasopressin (Units/kg/min)                            | 0 (0)                 | 0 (0)                    |
| <i>Vasoactive inotrope score</i>                      | 0 (0 – 12)            | 3 (0 – 5)                |

*Legend:* RVAD/ECMO, right ventricular assist device/extracorporeal membrane oxygenation; IMV, invasive mechanical ventilation; TAPSE, tricuspid annular plane systolic excursion

**sTable 2. Cox proportional hazard model including covariates**

|                     | <b>Unadjusted</b>      | <b>Model 1</b>         | <b>Model 2</b>         | <b>Model 3</b>         | <b>Model 4</b>         |
|---------------------|------------------------|------------------------|------------------------|------------------------|------------------------|
| RVAD/ECMO           | 0.17*<br>(0.037, 0.78) | 0.13*<br>(0.026, 0.61) | 0.14*<br>(0.027, 0.68) | 0.17*<br>(0.028, 0.98) | 0.17*<br>(0.030, 0.91) |
| Age                 |                        | 0.96<br>(0.93, 1.01)   |                        |                        | 0.96<br>(0.91, 1.00)   |
| Tocilizumab         |                        |                        | 1.66<br>(0.50, 5.54)   |                        | 1.19<br>(0.33, 4.23)   |
| Convalescent Plasma |                        |                        |                        | 1.05<br>(0.17, 6.29)   | 0.42<br>(0.065, 2.74)  |

*Legend:* Above values represented as hazard ratio (95% confidence interval). \*p < 0.05.

RVAD/ECMO, right ventricular assist device/extracorporeal membrane oxygenation

**sTable 3. Competing-risk analysis hazard ratios included consideration of covariates**

|                                        | <b>Unadjusted</b>    | <b>Adjusted</b>      |
|----------------------------------------|----------------------|----------------------|
| <b>Post-intubation ICU days</b>        |                      |                      |
| RVAD/ECMO                              | 1.47<br>(0.60, 3.59) | 1.25<br>(0.43, 3.69) |
| Age (years)                            |                      | 1.00<br>(0.96, 1.04) |
| Tocilizumab                            |                      | 0.51<br>(0.20, 1.32) |
| Convalescent Plasma                    |                      | 1.90<br>(0.65, 5.59) |
| <b>Post-intubation hospital days</b>   |                      |                      |
| RVAD/ECMO                              | 1.69<br>(0.70, 4.09) | 1.52<br>(0.60, 3.86) |
| Age (years)                            |                      | 0.99<br>(0.96, 1.03) |
| Tocilizumab                            |                      | 0.45<br>(0.18, 1.11) |
| Convalescent Plasma                    |                      | 1.92<br>(0.70, 5.27) |
| <b>Duration mechanical ventilation</b> |                      |                      |
| RVAD/ECMO                              | 1.75<br>(0.74, 4.15) | 1.25<br>(0.50, 3.10) |
| Age (years)                            |                      | 1.00<br>(0.97, 1.04) |
| Tocilizumab                            |                      | 0.59<br>(0.22, 1.60) |
| Convalescent Plasma                    |                      | 2.63<br>(0.96, 7.18) |

*Legend:* Values represented as hazard ratio (95% confidence interval). \*p < 0.05. ICU, intensive care unit; RVAD/ECMO, right ventricular assist device/extracorporeal membrane oxygenation

**sFigure 1. Cumulative incidence function for post-intubation ICU and hospitals days and duration of mechanical ventilation (unadjusted)**

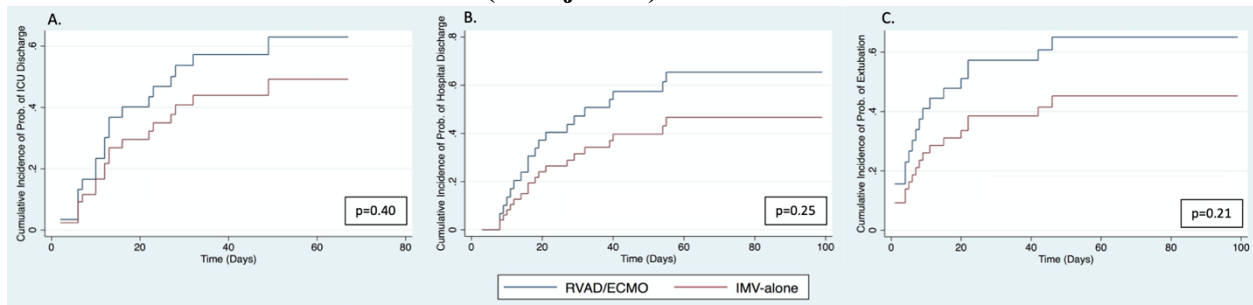

*Legend:* ICU, intensive care unit; RVAD/ECMO, right ventricular assist device/extracorporeal membrane oxygenation; IMV, invasive mechanical ventilation
